# Supplementary material for: Chondroitin sulfate glycan sulfation patterns influence histochemical labeling of perineuronal nets: a comparative study of interregional distribution in human and mouse brain
Source: PubMed Central journal article supplement — bioRxiv. 2024 Jun 21:2024.02.09.579711. Preprint. [Version 3] doi: 10.1101/2024.02.09.579711 (PMC11212934; doi:10.1101/2024.02.09.579711), 2024-06-21
Supplement: media-2.pdf [file media-2.pdf]

| Isomer |        | vmPFC | EC   | HPC  |
|--------|--------|-------|------|------|
| CS-A   | Mean % | 77.6  | 76.2 | 81.2 |
|        | SD     | 1.9   | 1.6  | 1.2  |
| CS-O   | Mean % | 13.6  | 11.4 | 5.0  |
|        | SD     | 2.2   | 0.6  | 0.9  |
| CS-D   | Mean % | 2.0   | 2.8  | 3.1  |
|        | SD     | 0.5   | 0.6  | 0.4  |
| CS-C   | Mean % | 5.6   | 8.4  | 9.5  |
|        | SD     | 1.7   | 1.4  | 1.1  |
| CS-E   | Mean % | 1.2   | 1.1  | 1.1  |
|        | SD     | 0.4   | 0.2  | 0.2  |

| Isomer |        | mPFC | EC   | vHPC |
|--------|--------|------|------|------|
| CS-A   | Mean % | 70.0 | 73.9 | 79.6 |
|        | SD     | 1.9  | 1.1  | 3.2  |
| CS-O   | Mean % | 17.6 | 16.8 | 8.0  |
|        | SD     | 1.5  | 0.7  | 1.4  |
| CS-D   | Mean % | 2.2  | 1.4  | 1.7  |
|        | SD     | 0.3  | 0.2  | 0.4  |
| CS-C   | Mean % | 8.3  | 6.4  | 9.2  |
|        | SD     | 0.8  | 0.6  | 1.4  |
| CS-E   | Mean % | 1.4  | 0.9  | 0.7  |
|        | SD     | 0.08 | 0.1  | 0.1  |

|      |        | vmPFC | EC   | HPC  |         | vmPFC – EC | vmPFC – HPC | EC - HPC |
|------|--------|-------|------|------|---------|------------|-------------|----------|
| ACAN | Mean % | 23.4  | 20.5 | 54.2 | p-value | 1.0        | <0.001      | < 0.001  |
|      | SD     | 8.7   | 15.8 | 15.8 |         |            |             |          |
| WFL  | Mean % | 28.3  | 66.8 | 25.7 | p-value | < 0.001    | 1.0         | < 0.001  |
|      | SD     | 10.1  | 19.4 | 13.7 |         |            |             |          |
| both | Mean % | 48.3  | 12.7 | 20.1 | p-value | < 0.001    | < 0.001     | 0.3      |
|      | SD     | 8.8   | 10.2 | 6.9  |         |            |             |          |

|      |        | mPFC | EC   | vHPC |         | mPFC – EC | mPFC – vHPC | EC - vHPC |
|------|--------|------|------|------|---------|-----------|-------------|-----------|
| ACAN | Mean % | 0    | 0.6  | 12.5 | p-value | 0.3       | 0.0002      | 0.0002    |
|      | SD     | 0    | 0.7  | 4.1  |         |           |             |           |
| WFL  | Mean % | 94.7 | 92.3 | 39.5 | p-value | > 0.9999  | < 0.0001    | < 0.0001  |
|      | SD     | 5.8  | 4.9  | 9.2  |         |           |             |           |
| both | Mean % | 5.5  | 7.1  | 47.9 | p-value | > 0.9999  | < 0.0001    | < 0.0001  |
|      | SD     | 5.8  | 4.6  | 10.2 |         |           |             |           |

Mean %: Mean percentage of PNNs with this labeling

SD: Standard deviation
